# Supplementary material for: Fate of nitrogen in overlying water with biochar addition to sediment in planted ditches
Source: Royal Society of Chemistry journal article supplement (doi:10.1039/c7em00445a), 2017-12-20
Supplement: c7em00445a1.pdf [file c7em00445a1.pdf]

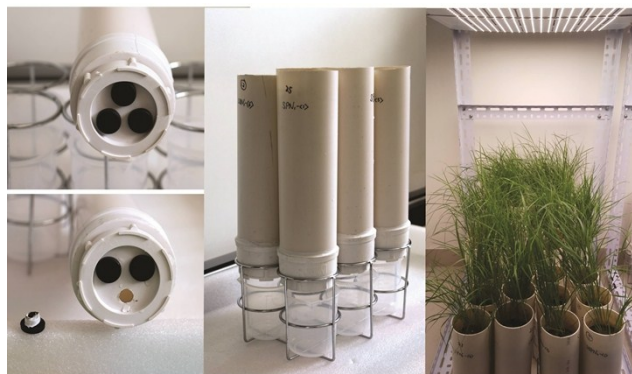

Fig. S1. The settings and scale of microcosms (constructed ditches).

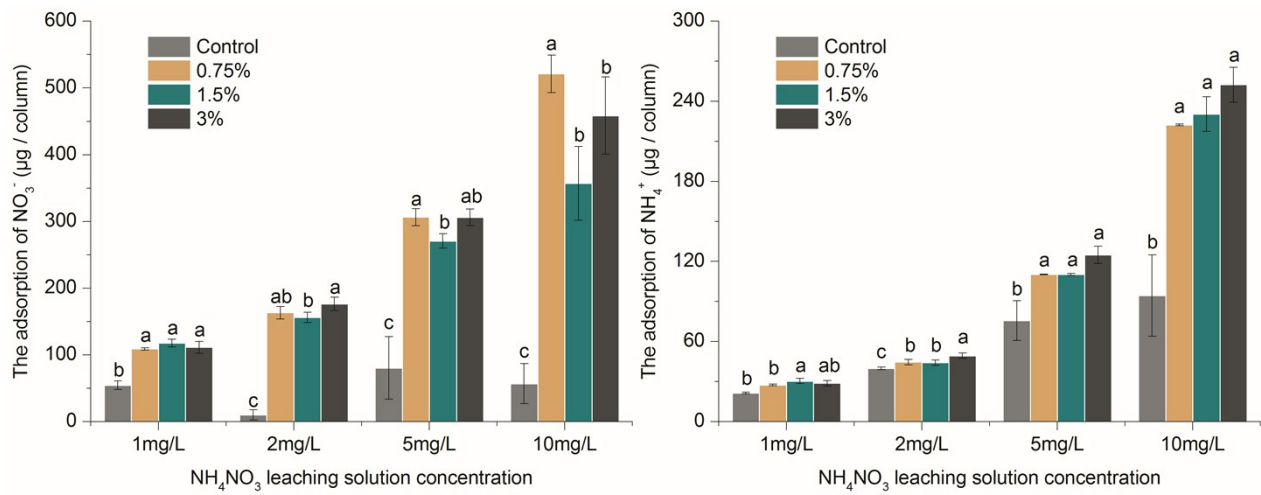

Fig. S2. Adsorptions of inorganic nitrogen ( $\mu\text{g} / \text{column}$ ) of four treatments with different biochar addition ratios (by mass) during soil column leaching experiment: “Control” refers to “sediment only”; “0.75%” refers to “sediment +0.75% biochar”; “1.5%” refers to “sediment +1.5% biochar”; “3%” refers to “sediment +3% biochar”. Horizontal axis indicates the concentration of  $\text{NH}_4\text{NO}_3$  leaching solution. Data points are means  $\pm$  SD (standard deviation) ( $n=3$ ). Different letters indicate significant differences among different treatments at  $P < 0.05$  (ANOVA, LSD tests).

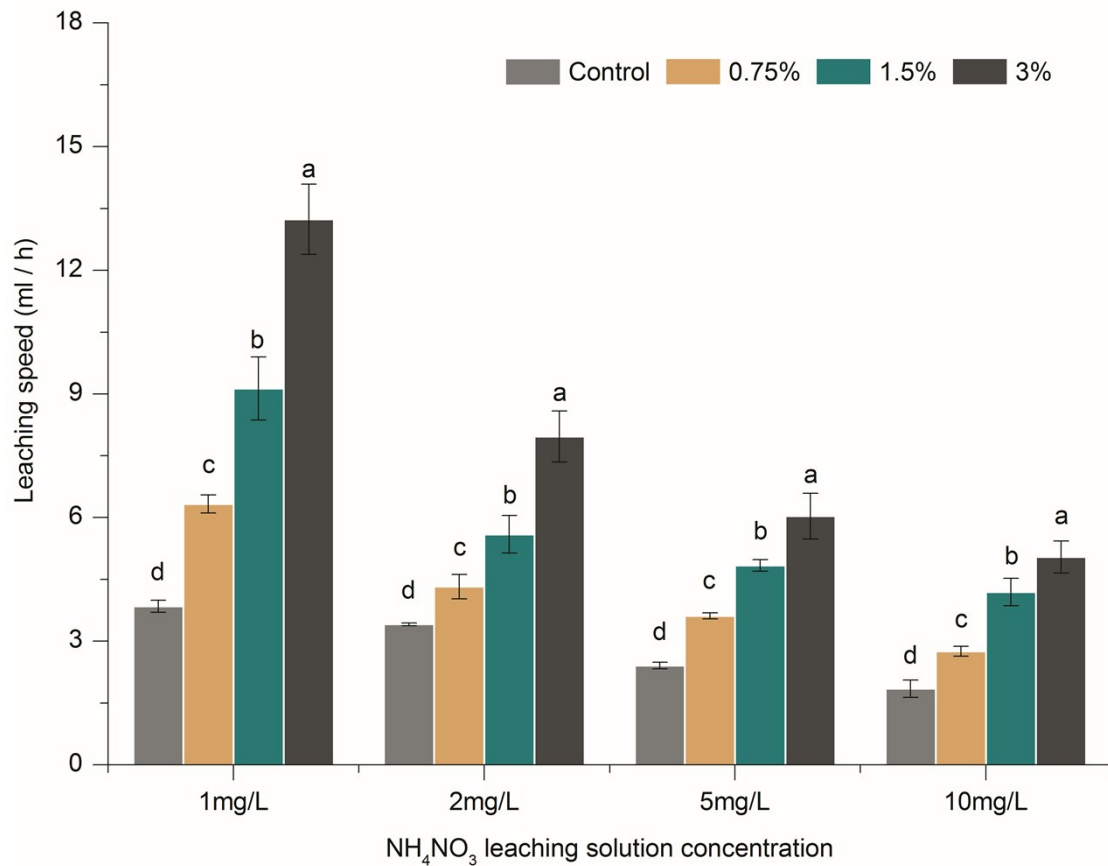

Fig. S3. Leaching speed (ml / h) of four treatments with different biochar addition ratios (by mass) during soil column leaching experiment: “Control” refers to “sediment only”; “0.75%” refers to “sediment +0.75% biochar”; “1.5%” refers to “sediment +1.5% biochar”; “3%” refers to “sediment +3% biochar”. Horizontal axis indicates the concentration of NH<sub>4</sub>NO<sub>3</sub> leaching solution. Data points are means ±SD (standard deviation) (n=3). Different letters indicate significant differences among different treatments at  $P < 0.05$  (ANOVA, LSD tests).
